# Supplementary material
Source: publisher figshare collection journal article supplement (https://acs.figshare.com/ndownloader/files/3959308)
Supplement: Supplementary file 1 [file 3959308]

## **Supporting Information**

### **Urea Induced Unfolding Dynamics of Flavin Adenine Dinucleotide (FAD): Spectroscopic and Molecular Dynamics Simulation Studies from Femto-second to Nano-second Regime**

Abhigyan Sengupta<sup>||</sup>, Reman K. Singh<sup>||</sup>, Krishna Gavvala, Raj Kumar Koninti, Arnab Mukherjee<sup>\*</sup>, Partha Hazra<sup>\*</sup>

Department of Chemistry, Mendeleev Block,  
Indian Institute of Science Education and Research (IISER)-Pune,  
Pune (411008), Maharashtra, India.

---

<sup>\*</sup> E-mail: [arnab.mukherjee@iiserpune.ac.in](mailto:arnab.mukherjee@iiserpune.ac.in), [p.hazra@iiserpune.ac.in](mailto:p.hazra@iiserpune.ac.in). Tel.: +91-20-2590-8077 (P. Hazra), +91-20-2590-8051 (A. Mukherjee); Fax: +91-20-2589 9790 (P. Hazra). <sup>||</sup> denotes equal contribution.

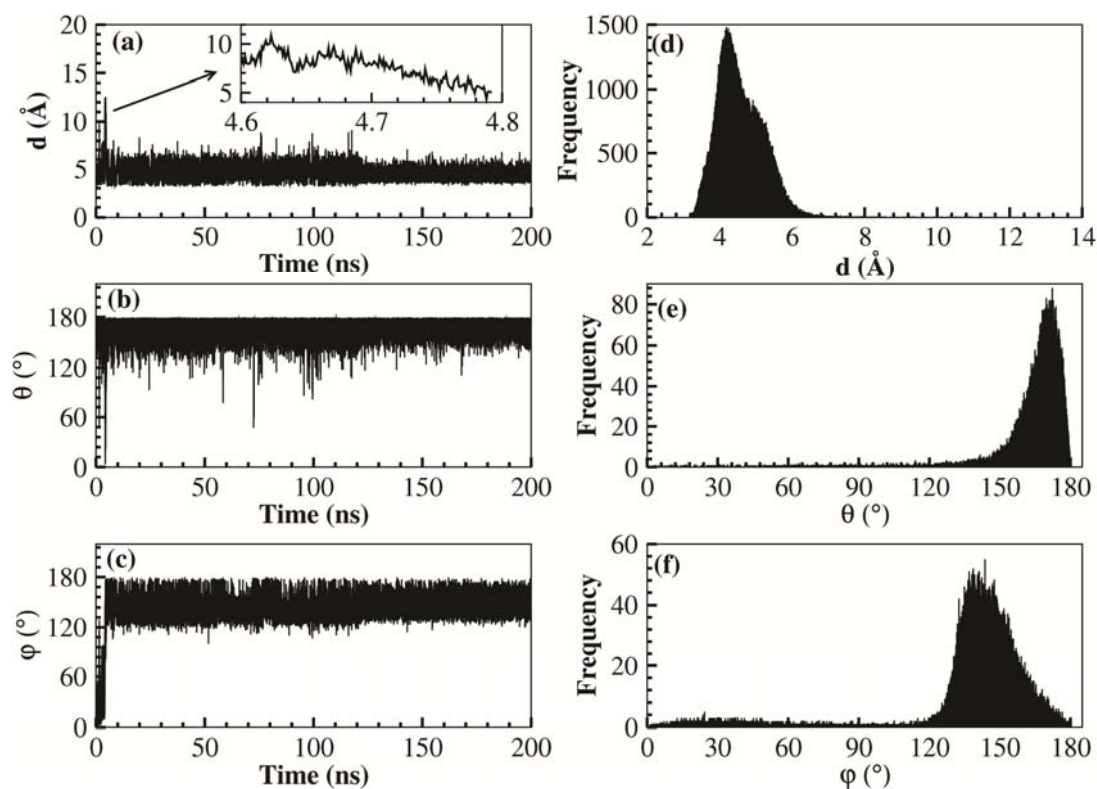

**Figure S1:** (a), (b) and (c) show the variation of  $d$ ,  $\theta$ ,  $\phi$ , respectively with time in water. (d), (e) and (f) are the distribution of the three parameters ( $d$ ,  $\theta$  and  $\phi$ ) in water solvent. When  $d \leq 6 \text{ \AA}$ , and the angles is  $40^\circ \geq \{\theta, \phi\} \geq 140^\circ$ , we defined these conformations as stack conformations.

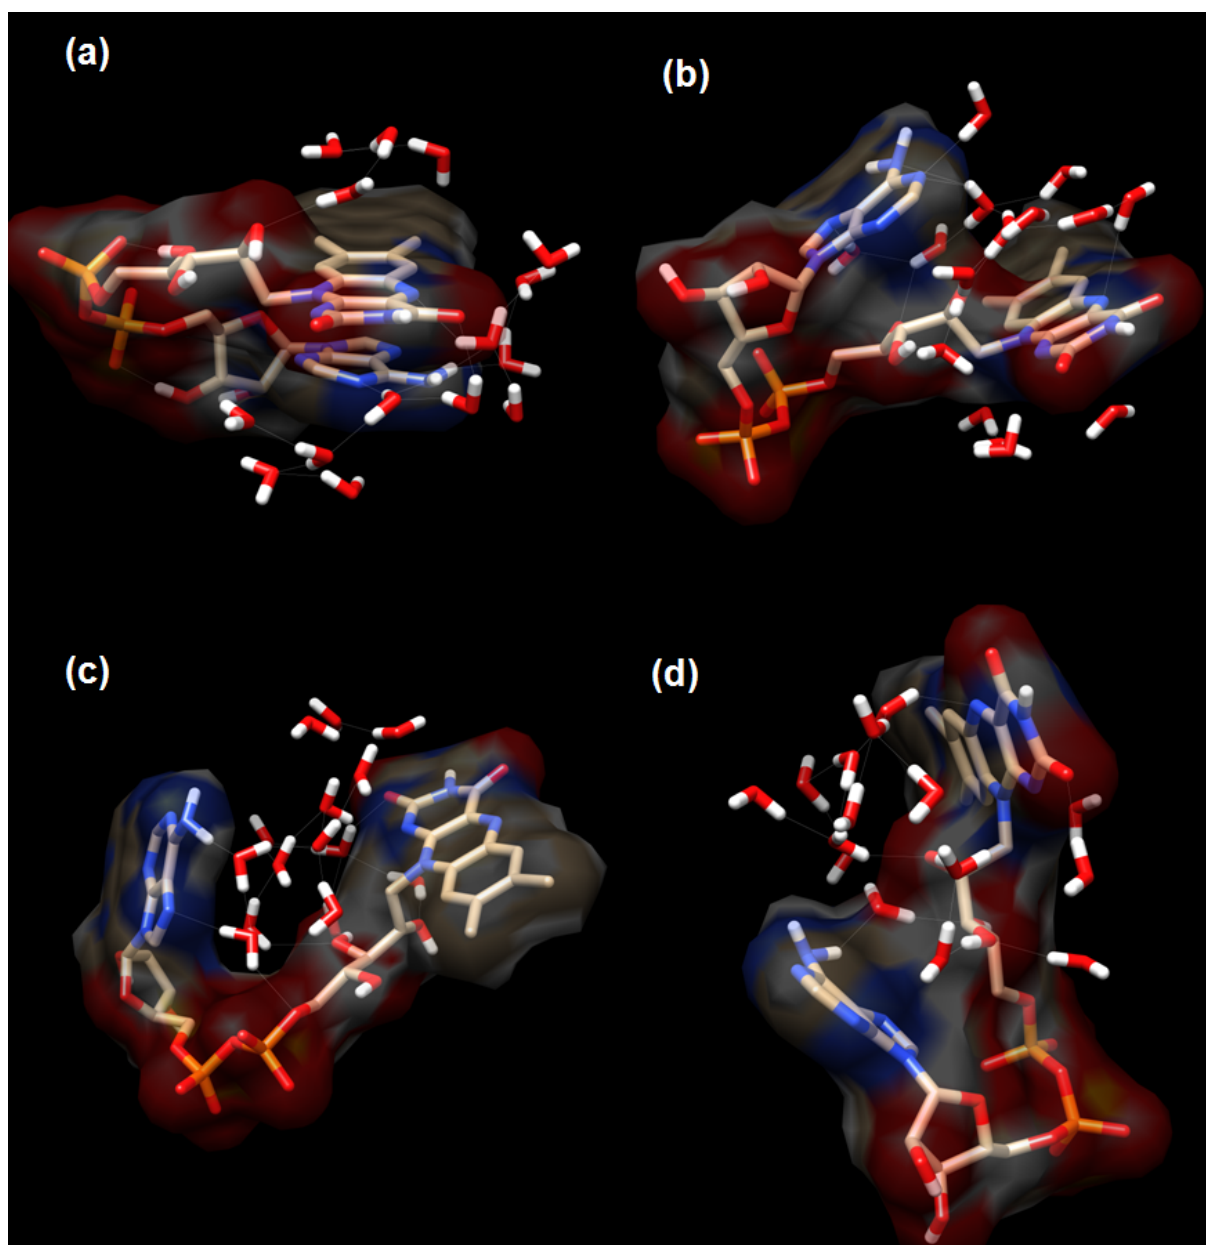

**Figure S2:** Orientations of water molecules around adenine and isoalloxazine rings of FAD at different time points in the trajectory.

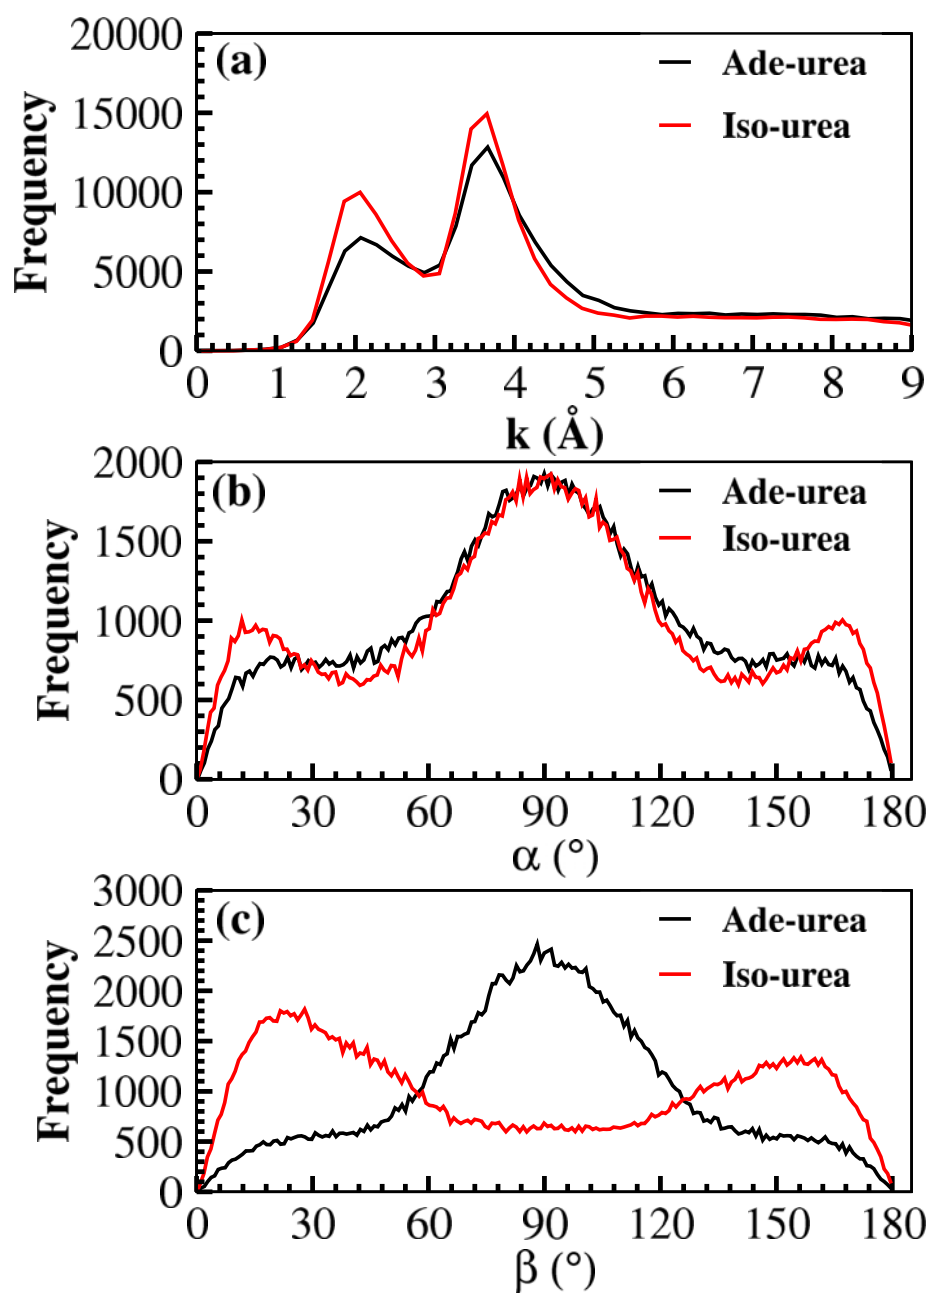

**Figure S3:** Distribution of  $k$ ,  $\alpha$  and  $\beta$  for Ade/Iso with urea. (a) distribution of distance ( $k$ ) between the COMs of Ade and urea, Iso and urea. (b) Distribution of angle ( $\alpha$ ) between the Ade and urea, Iso and urea. (c) Distribution of angle ( $\beta$ ) between Ade and urea, Iso and urea.
